# Supplementary material for: Hyphopodium-Specific Signaling Is Required for Plant Infection by Verticillium dahliae
Source: MDPI journal article supplement (doi:10.3390/jof9040484), 2023-04-18
Supplement: s1 [file s1]

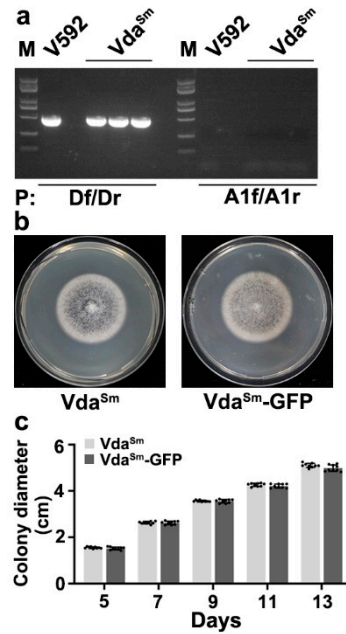

**Figure S1.** The colony morphology and growth rate of *VdaSm* and *VdaSm-GFP* on PDA plates. (a) PCR assays differentiated the *Verticillium* species. The primer pair Df/Dr amplified *V. dahliae* and *V. longisporum* strains, whereas A1f/A1r was specific to *V. longisporum*. V592 was used as a control. M indicated the marker; (b) The colony morphology of *VdaSm* and *VdaSm-GFP* on PDA plates; (c) The diameter of colonies at 5, 7, 9, 11 and 13 days. For each strain, 9 plates were repeated. No significant differences were noticed ( $P > 0.05$ , t-test). Error bar showed the standard deviations.

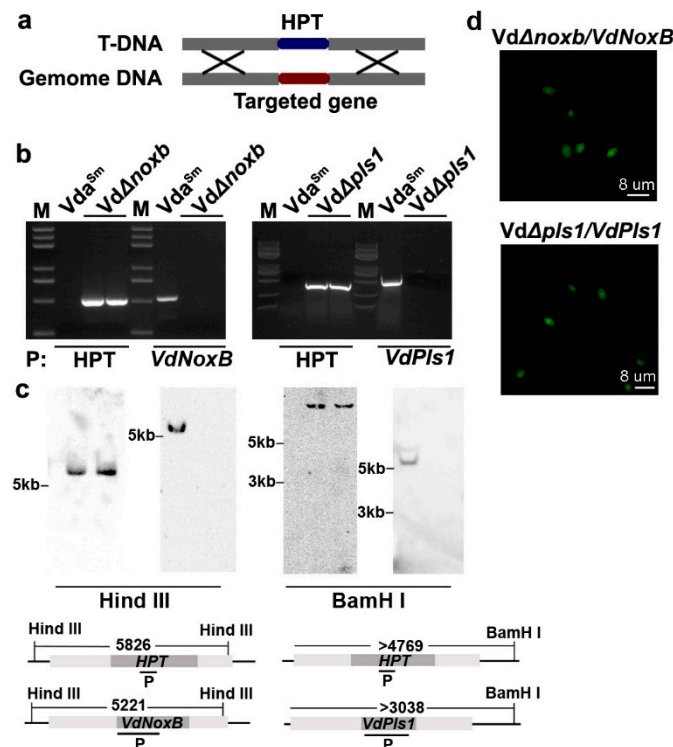

**Figure S2.** Construction of knockout mutants *VdΔnox**b* and *VdΔpls**1*, and complemented strains *VdΔnox**b/VdNoxB* and *VdΔpls**1/VdPls1*. (a) Schematic description of the homologous recombination event; (b) PCR analysis of targeted gene deletion mutants with special primers as indicated; (c) Southern blot identification of mutants with the *HPT*, *VdNoxB* and *VdPls1* probes as indicated. Genomic DNA was digested by Hind III and BamH I, respectively. The schematic diagrams showed the cleavage sites of

restriction enzymes and the expected fragment sizes; (d) Confocal micrograph of green fluorescence by *VdΔnoxB/VdNoxB* and *VdΔpls1/VdPls1*.

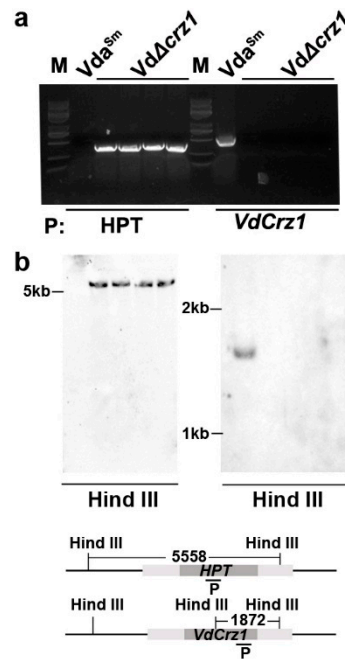

**Figure S3.** Identification of the *VdCrz1* knockout mutant. (a) PCR identification of the *VdCrz1* knockout mutant with the primers HPT and *VdCrz1* as indicated; (b) Southern blot analysis of *VdCrz1* gene deletion with *HPT* and *VdCrz1* probes as indicated. Genomic DNA was digested by *Hind III*. The schematic diagrams showed the cleavage sites of restriction enzymes and the expected fragment sizes.

**Table S1.** Primers were used in this study.

| <b>Name</b>         | <b>Primer Sequence(5'-3')</b>                    | <b>Purpose</b> |
|---------------------|--------------------------------------------------|----------------|
| <b>ITS1</b>         | TCCGTAGGTGAACCTGCGG                              | Sequencing     |
| <b>ITS4</b>         | TCCTCCGCTTATTGATATGC                             | Sequencing     |
| <b>A1f</b>          | AAGTGGAGCCCCGTATCTTGAAT                          | Sequencing     |
| <b>A1r</b>          | CAACTGGCAACAGGGCTTGAAT                           | Sequencing     |
| <b>Df</b>           | CCGGTCCATCAGTCTCTCTG                             | Sequencing     |
| <b>Dr</b>           | CTGTTGCCGCTTCACTCG                               | Sequencing     |
| <b>KONoxB-U-F</b>   | CTTGCTGAGGTCTTAATTAACAACAAGAGCCGCA<br>ATCAA      | Cloning        |
| <b>KONoxB-U-R</b>   | AGTGCTGAGGCATTAATTAACGTGCTGGTAGTGC<br>TATAATCGT  | Cloning        |
| <b>KONoxB-D-F</b>   | CCCCTGAGGACTTAATTAAAGGGGGCAAGGCG<br>TGGAGCA      | Cloning        |
| <b>KONoxB-D-R</b>   | CTCGCTGAGGGTTTAATTAAATGGAACACGCTCA<br>AACACGTCG  | Cloning        |
| <b>KOPls1-U-F</b>   | CTTGCTGAGGTCTTAATTAAAGCGCACTAGGTGC<br>TTGCAAGT   | Cloning        |
| <b>KOPls1-U-R</b>   | AGTGCTGAGGCATTAATTAAGTTGCTGGCGGTCT<br>CGAGGACT   | Cloning        |
| <b>KOPls1-D-F</b>   | CCCCTGAGGACTTAATTAAACGACCGTAAAGCC<br>GATCTC      | Cloning        |
| <b>KOPls1-D-R</b>   | CTCGCTGAGGGTTTAATTAAAGAGGCAAGGAAATG<br>ATGATCAGT | Cloning        |
| <b>KOCrz1-U-F</b>   | CTTGCTGAGGTCTTAATTAACTCCAGCGCTCATCT<br>ACCCT     | Cloning        |
| <b>KOCrz1-U-R</b>   | AGTGCTGAGGCATTAATTAAGGTTGGGGACGTGT<br>CGTGAGTA   | Cloning        |
| <b>KOCrz1-D-F</b>   | CCCCTGAGGACTTAATTAAAGTGTGCCTTTGTTCT<br>TCTTC     | Cloning        |
| <b>KOCrz1-D-R</b>   | CTCGCTGAGGGTTTAATTAAAGAGGACCATGTTC<br>CATAACG    | Cloning        |
| <b>pGKO-check-F</b> | GTCGACGGTATCGATAAGCTTGCTC                        | Checking       |
| <b>pGKO-check-R</b> | CGGACATGCAGCTCACGCCTA                            | Checking       |
| <b>HPT-F</b>        | ATAAGAGTCACACTTCGAGCGCC                          | Checking       |
| <b>HPT-R</b>        | GCTCATGAGCGCTTGTTTCGG                            | Checking       |
| <b>PnoxB-NoxB-F</b> | TAAAACGACGGCCAGTGCCAAGCTTCTCCAGGT<br>AACAGGGAAGA | Cloning        |
| <b>PnoxB-NoxB-R</b> | GCCCATCGAGTAGTAGTCCATCGTGCTGGTAGTG<br>CTATAAT    | Cloning        |

|                                     |                                                   |                   |
|-------------------------------------|---------------------------------------------------|-------------------|
| <b>NoxB-GFP-F</b>                   | AGCACGATGGACTACTACTCGATGGGCTC                     | Cloning           |
| <b>NoxB-GFP-R</b>                   | AATTAAGCCGCCTCCGCCGAAGTTCTCCT<br>TGCCCCATT        | Cloning           |
| <b>Ppls1-Pls1-F</b>                 | TAAAACGACGGCCAGTGCCAAGCTTGGGCACGG<br>CACAAAGGGTCA | Cloning           |
| <b>Ppls1-Pls1-R</b>                 | GATCTTGTTGACCATGTTGCTGGCGGTCTCGAGG<br>ACTGT       | Cloning           |
| <b>Pls1-GFP-F</b>                   | GCCAGCAACATGGTCAACAAGATCCTCGCGACC<br>TTCG         | Cloning           |
| <b>Pls1-GFP-R</b>                   | AATTAAGCCGCCTCCGCCGAGGCTGCGGTATCC<br>GCT          | Cloning           |
| <b>pTef-Kar2-<br/>RFP-F</b>         | AACCTCTAGAGGATCCATGTCTGAGGTCTC<br>GCAAC           | Cloning           |
| <b>pTef-Kar2-<br/>RFP-R</b>         | CACCAGCACCGAATTCGAGCTCGTCGTGG<br>GAGGC            | Cloning           |
| <b>HPT-probe-F</b>                  | CTTCTGCGGGCGATTTGTGTAC                            | Southern Blotting |
| <b>HPT-probe-R</b>                  | CATGTGTATCACTGGCAAACCTGTG                         | Southern Blotting |
| <b>NoxB-probe-F</b>                 | GACTACTACTCGATGGGCTC                              | Southern Blotting |
| <b>NoxB-probe-R</b>                 | AATCTTCCTCAGGCGCACTCGT                            | Southern Blotting |
| <b>Pls1-probe-F</b>                 | GATGTGCTTTTCCTGATCAC                              | Southern Blotting |
| <b>Pls1-probe-R</b>                 | CGGTCCTCCAGTAGCACAGCAAG                           | Southern Blotting |
| <b>Crz1-probe-F</b>                 | ACGTTCCAGTGCAACCTGTGT                             | Southern Blotting |
| <b>Crz1-probe-R</b>                 | ATCAAACGAAGACCGTCCCGAAA                           | Southern Blotting |
| <b>NAT-probe-F</b>                  | TGGAGCTAGTGGAGGTCAAC                              | Southern Blotting |
| <b>NAT-probe-R</b>                  | GAGGCCCTTTCGTCTTCAAG                              | Southern Blotting |
| <b><math>\beta</math>-tublin-qF</b> | AGCTCACCCAGCAGATGTTC                              | RT-qPCR           |
| <b><math>\beta</math>-tublin-qR</b> | TCGACCTCCTTCATGGCAAC                              | RT-qPCR           |
| <b>VdCrz1-qF</b>                    | TTTACTCGCGCGTACAACCT                              | RT-qPCR           |
| <b>VdCrz1-qR</b>                    | AACTTCTTCTCGCCCGAGTG                              | RT-qPCR           |
| <b>VdLcc-qF</b>                     | TACCTCTTCCACTGCCACATC                             | RT-qPCR           |
| <b>VdLcc-qR</b>                     | GTTTCCGCCAGCATTACCA                               | RT-qPCR           |
| <b>VdRhom-qF</b>                    | CCCATGATTGGCCCTCTTT                               | RT-qPCR           |
| <b>VdRhom-qR</b>                    | CACCAAATGGGCTGTTGAGC                              | RT-qPCR           |

---
